# Supplementary material for: Optimized deep learning models for effluent prediction in wastewater treatment processes
Source: Royal Society of Chemistry journal article supplement (doi:10.1039/d3ew00875d), 2024-01-01
Supplement: d3ew00875d1.pdf [file d3ew00875d1.pdf]

## Supplementary Information

# Optimized Deep Learning Models for Effluent Prediction in Wastewater Treatment Processes

Canyun Yang<sup>a</sup>, Zhuoyue Guo<sup>a</sup>, Yun Geng<sup>a</sup>, Fengshan Zhang<sup>c</sup>, Wenguang Wei<sup>c</sup>,

Hongbin Liu<sup>a,b,c,\*</sup>

<sup>a</sup> Jiangsu Co-Innovation Center of Efficient Processing and Utilization of Forest Resources, Nanjing Forestry University, Nanjing 210037, China

<sup>b</sup> Guangxi Key Laboratory of Clean Pulp & Papermaking and Pollution Control, College of Light Industry and Food Engineering, Guangxi University, Nanning 530004, China

<sup>c</sup> Laboratory for Comprehensive Utilization of Paper Waste of Shandong Province, Shandong Huatai Paper Co. Ltd., Dongying 257335, China

Corresponding Author:

\*H.L. Tel.: +86-25-85427620; Fax: +86-25-85428793;

E-mail: hongbinliu@njfu.edu.cn

Submitted to

**Environmental Science - Water Research & Technology**

March 1, 2024

Figure S1 displays scatter plots of the 8 predictor variables versus the response variable, COD-S.

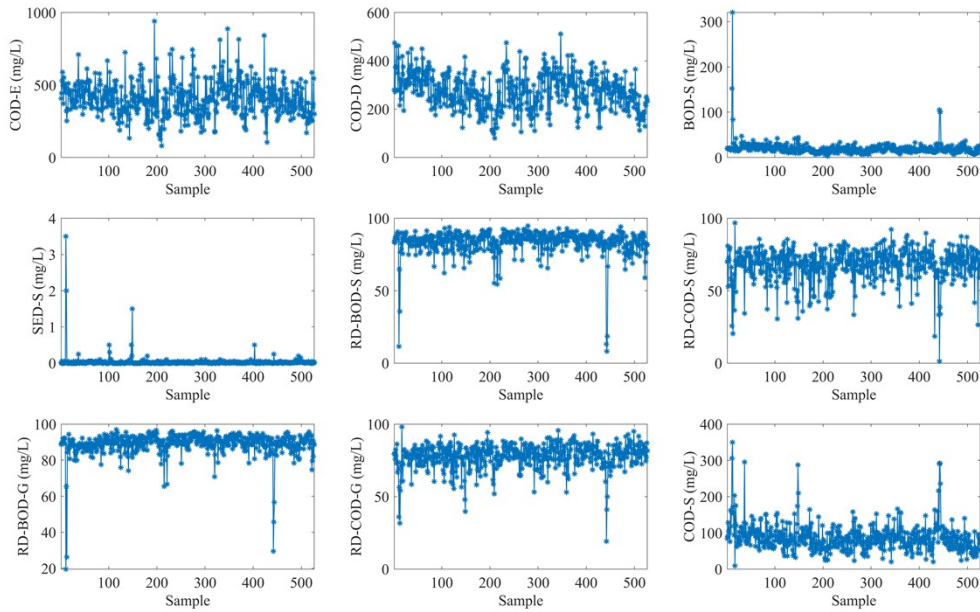

**Figure S1.** Predictor variables and response variable COD-S

Scatter plots of the nine predictor variables versus the response variable SS-S are shown in Figure S2.

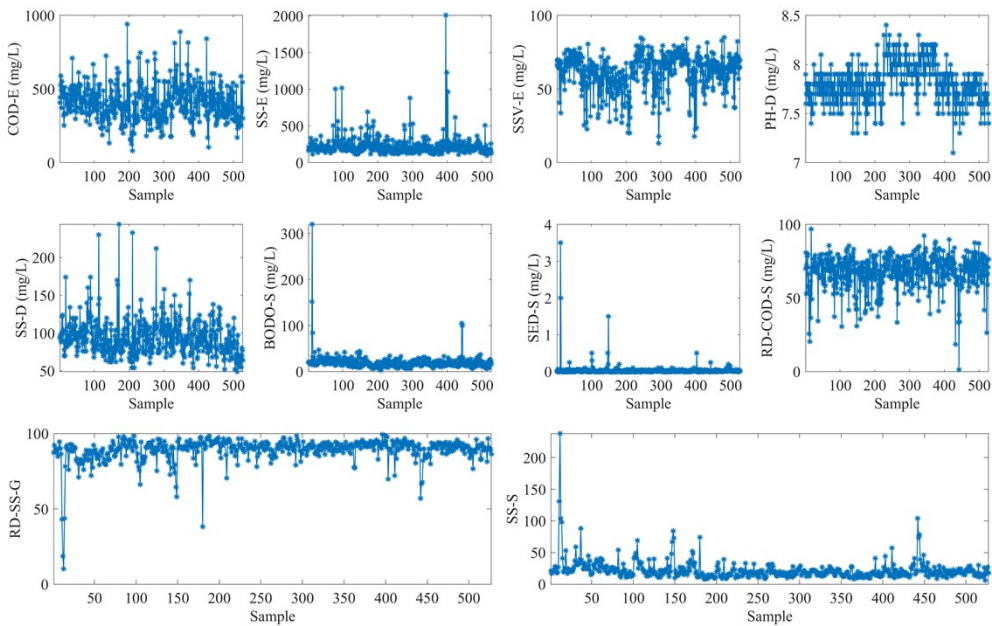

**Figure S2.** Predictor variables and response variable SS-S

Specific variable names and corresponding variable contents of the data used in the paper are shown in Table S1.

**Table S1** Variable names and meanings in urban sewage data

| Variable name | Implication                                              |
|---------------|----------------------------------------------------------|
| COD-E         | Input chemical oxygen demand                             |
| COD-D         | Oxygen input to secondary settler Chemical Oxygen Demand |
| BOD-S         | Output Biological Oxygen Demand                          |
| COD-S         | Output Chemical Oxygen Demand                            |
| SS-S          | Output of suspended solids                               |
| SED-S         | Exporting sediments                                      |
| RD-BOD-S      | Secondary settler input BOD                              |
| RD-COD-S      | Oxygen input to secondary settler Chemical Oxygen Demand |
| RD-BOD-G      | Global input of biological oxygen demand                 |
| RD-COD-G      | Global Energy Input Chemical Oxygen Demand               |
| SS-E          | Input suspended matter                                   |
| SSV-E         | Input volatile suspended solids                          |
| PH-D          | Secondary settler input pH                               |
| SS-D          | Secondary settler input suspended solids                 |
| RD-SS-G       | Global ability to enter suspensions                      |

Table S2 shows the mean value, standard deviation, minimum value and maximum value of some data in this data set.

**Table S2** Descriptive statistics of urban sewage data

| Variable name | Standard deviation | Mean   | Maximum | Minimum |
|---------------|--------------------|--------|---------|---------|
| COD-E         | 119.79             | 406.91 | 81.00   | 941.00  |
| COD-D         | 73.72              | 273.99 | 80.00   | 511.00  |
| BOD-S         | 17.20              | 20.00  | 3.00    | 320.00  |
| COD-S         | 9.30               | 80.11  | 29.20   | 100.00  |
| SS-S          | 0.19               | 0.04   | 0.00    | 3.50    |
| SED-S         | 14.06              | 38.81  | 0.60    | 79.10   |
| RD-BOD-S      | 6.84               | 88.97  | 19.60   | 97.00   |
| RD-COD-S      | 8.75               | 77.87  | 19.20   | 98.10   |
| RD-BOD-G      | 8.16               | 88.96  | 10.30   | 99.40   |
| RD-COD-G      | 4.33               | 99.10  | 36.40   | 100.00  |
| SS-E          | 135.82             | 227.38 | 98.00   | 2008.00 |
| SSV-E         | 12.30              | 61.36  | 13.20   | 85.00   |
| PH-D          | 0.20               | 7.81   | 7.10    | 8.40    |
| SS-D          | 23.96              | 94.19  | 49.00   | 244.00  |
| RD-SS-G       | 38.43              | 87.12  | 9.00    | 350.00  |

The structural diagram of the GRU is illustrated in Figure S3, where  $h$  denotes the internal memory state vector of GRU and  $h_{t-1}$  denotes the hidden state of the previous moment, encapsulating information from data observed by the preceding node.  $h_t$  denotes the hidden state passed to the next moment.  $\tilde{h}_t$  denotes the candidate's hidden state.  $r_t$  and  $z_t$  denote the reset gate and update gate, respectively, the Sigmoid function,

and the Tanh function.  $x_t$  denotes the input of the present node.

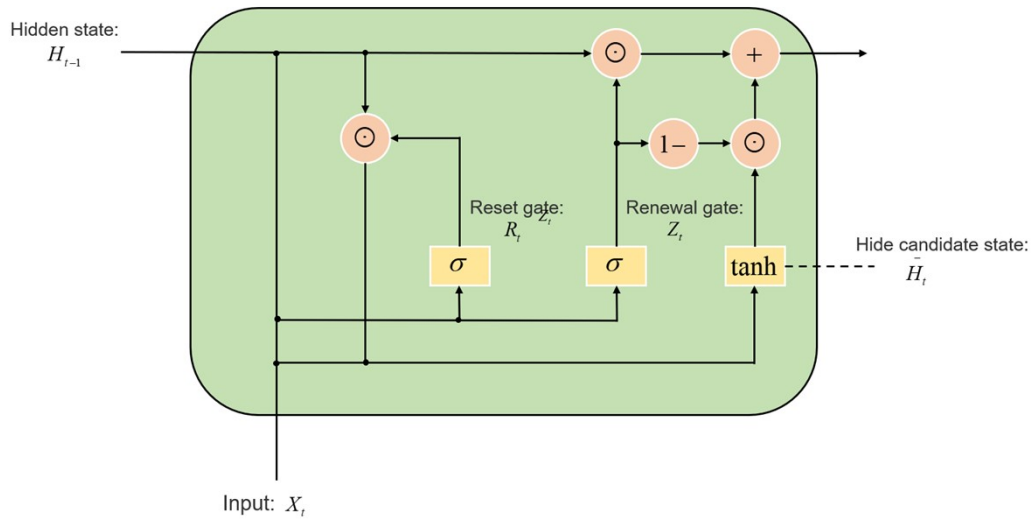

**Figure S3.** GRU Network Structure Diagram

The results of the coefficient paths obtained by Lasso regression are displayed in

Figure S4.

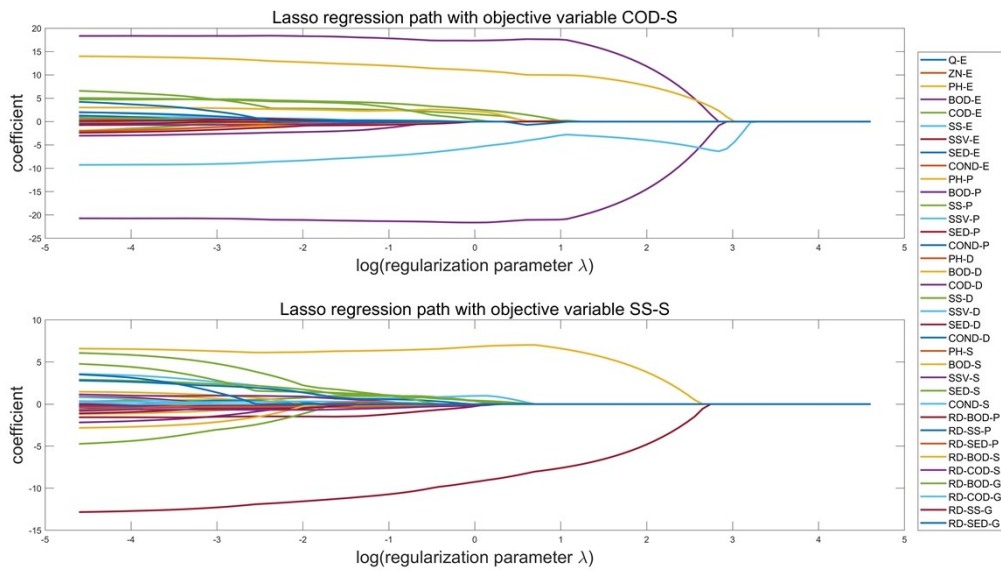

**Figure S4.** Path diagram of coefficients of Lasso regression

The specific numbers of  $R^2$ , RMSE, and MAPE statistics when different models predict COD are shown in Table S3.

**Table S3.** Comparison of different modeling methods for prediction of COD-S

| Methods           | Training set |             |             |             | Test set    |             |             |             |
|-------------------|--------------|-------------|-------------|-------------|-------------|-------------|-------------|-------------|
|                   | $R^2$        | RMSE        | MAE         | MAPE        | $R^2$       | RMSE        | MAE         | MAPE        |
| Lasso-RF          | 0.91         | 11.34       | 4.95        | 0.07        | 0.86        | 14.30       | 7.72        | 0.11        |
| Lasso-LSTM        | 0.97         | 6.18        | 5.29        | 0.05        | 0.91        | 11.06       | 5.29        | 0.07        |
| Lasso-CNN         | 0.94         | 9.22        | 6.44        | 0.10        | 0.84        | 15.39       | 8.09        | 0.13        |
| Lasso-GRU         | 0.92         | 10.78       | 8.88        | 0.14        | 0.87        | 13.99       | 11.0        | 0.18        |
|                   |              |             |             |             |             |             | 2           |             |
| Lasso-CNN-GRU     | 0.97         | 3.06        | 6.18        | 0.04        | 0.91        | 4.12        | 11.9        | 0.05        |
|                   |              |             |             |             |             |             | 4           |             |
| <b>BO-CNN-GRU</b> | <b>0.99</b>  | <b>3.47</b> | <b>1.70</b> | <b>0.02</b> | <b>0.97</b> | <b>6.49</b> | <b>2.50</b> | <b>0.03</b> |

The specific numerical statistics of  $R^2$ , RMSE, and MAPE when different models predict SS are listed in Table S4.

**Table S4.** Comparison of different modeling methods for prediction of SS-S

| Methods           | Training set |             |             |             | Test set    |             |             |             |
|-------------------|--------------|-------------|-------------|-------------|-------------|-------------|-------------|-------------|
|                   | $R^2$        | RMSE        | MAE         | MAPE        | $R^2$       | RMSE        | MAE         | MAPE        |
| Lasso-RF          | 0.76         | 8.66        | 3.62        | 0.15        | 0.62        | 7.27        | 5.00        | 0.27        |
| Lasso-LSTM        | 0.76         | 8.52        | 5.14        | 0.23        | 0.71        | 6.39        | 4.48        | 0.24        |
| Lasso-CNN         | 0.97         | 3.32        | 2.42        | 0.12        | 0.86        | 4.45        | 2.69        | 0.14        |
| Lasso-GRU         | 0.95         | 3.81        | 2.84        | 0.14        | 0.80        | 5.30        | 3.47        | 0.19        |
| Lasso-CNN-GRU     | 0.93         | 3.15        | 4.81        | 0.16        | 0.89        | 3.97        | 4.17        | 0.17        |
| <b>BO-CNN-GRU</b> | <b>0.96</b>  | <b>3.52</b> | <b>1.90</b> | <b>0.09</b> | <b>0.90</b> | <b>3.61</b> | <b>2.36</b> | <b>0.12</b> |
